# Supplementary material
Source: PubMed Central journal article supplement (PMC4141044)

## ***Supplementary Information***

### ***Legends***

#### ***Supplementary Figure 1: Identification of ERK2 independent phosphorylation sites on Tpr.***

(A) Schematic representation of the various C-terminal deletion constructs of Tpr. (B) 100 mm dishes of COS-I cells were individually transfected with 8  $\mu$ g each of the above mentioned constructs along with wild-type TprC and TprC-M4 plasmids and were metabolically labelled for 3 hours. The cell lysates were immunoprecipitated with anti-FLAG antibodies and the samples were resolved, transferred, and autoradiographed. The resulting *in vivo*-labeled FLAG-tagged proteins were digested with trypsin, and the resulting phosphopeptides were mapped by two-dimensional TLC. Dotted circle indicates ERK mediated phosphorylation, black arrows indicate labeled ERK independent phospho-peptides and white arrows indicate disappearance of labeled phospho-peptide spots.

#### ***Supplementary Figure 2: (A) HEK-293T cells were transfected with NS-siRNA or Tpr-siRNA along with Flag-Tpr-Si, Flag-Tpr-S2059A-Si, Flag-Tpr-S2094A-Si, Gag/Pol-CTE and CMV- $\beta$ -Gal reporter constructs. 48 hours post transfection, the cells were replated and a second transfection with same constructs was done. Western blot analysis of lysates obtained 48 hours after second transfection indicates the efficient Tpr knockdown and the restoration of Tpr levels upon rescue. (B) The amount of p24 and $\beta$ -Gal expression was estimated in the lysates and the obtained values were normalized. Data represents the average of values and the error bars correspond to the SD obtained from three independent transfections.***

(A) HEK-293T cells were transfected with NS-siRNA or Tpr-siRNA along with Flag-Tpr-Si, Flag-Tpr-S2059A-Si, Flag-Tpr-S2094A-Si, Gag/Pol-CTE and CMV-  $\beta$ -Gal reporter constructs. 48 hours post transfection, the cells were replated and a second transfection with same constructs was done. Western blot analysis of lysates obtained 48 hours after second transfection indicates the efficient Tpr knockdown and the restoration of Tpr levels upon rescue. (B) The amount of p24 and  $\beta$ -Gal expression was estimated in the lysates and the obtained values were normalized. Data represents the average of values and the error bars correspond to the SD obtained from three independent transfections.

#### ***Supplementary Figure 3: (A) Asynchronous HeLa cells were stained with anti-pS2059-Tpr (Green), anti-Nup153 (red) and anti-Tpr (cyan) antibodies. The cells captured at interphase and telophase are represented (Scale bar, 10 $\mu$ m) (B) HeLa cells were transfected with NS-siRNA or Tpr-siRNA, and were incubated for 48 hours. The cells were then stained with anti-Tpr (red) anti-Mad2 antibodies (Green) and analysed for Mad2 distribution by confocal microscopy.***

(A) Asynchronous HeLa cells were stained with anti-pS2059-Tpr (Green), anti-Nup153 (red) and anti-Tpr (cyan) antibodies. The cells captured at interphase and telophase are represented (Scale bar, 10  $\mu$ m) (B) HeLa cells were transfected with NS-siRNA or Tpr-siRNA, and were incubated for 48 hours. The cells were then stained with anti-Tpr (red) anti-Mad2 antibodies (Green) and analysed for Mad2 distribution by confocal microscopy.

Supplementary Fig 1

A.

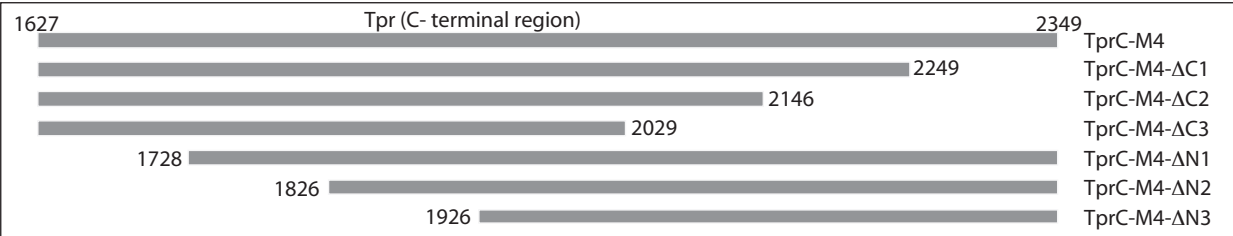

B.

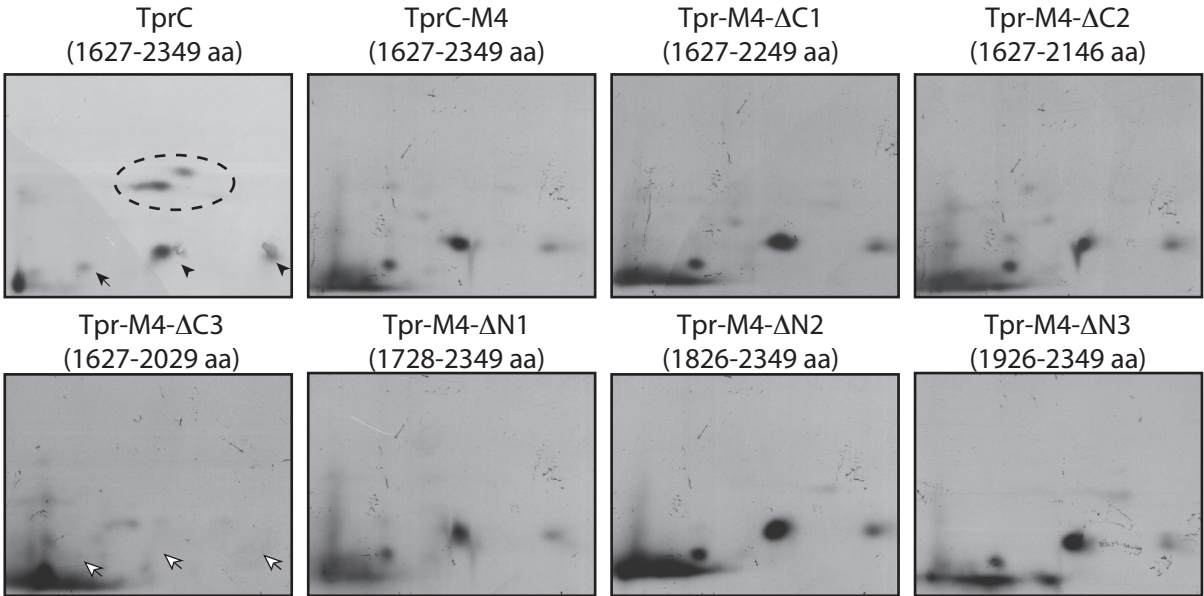

## Supplementary Figure 2

A.

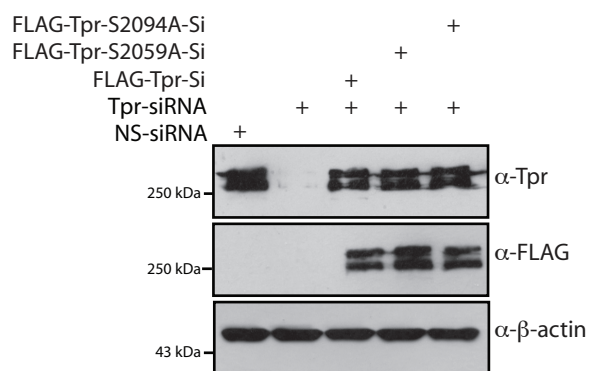

B.

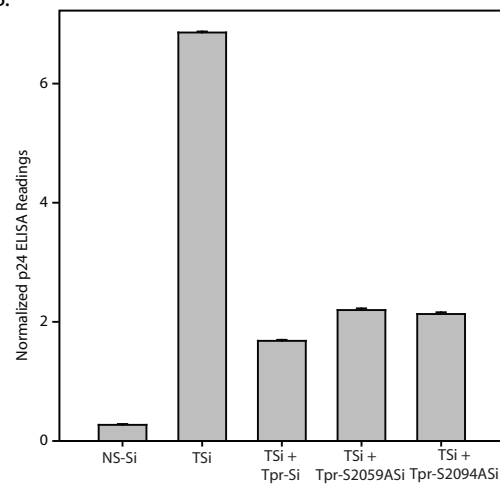

Supplementary Fig 3

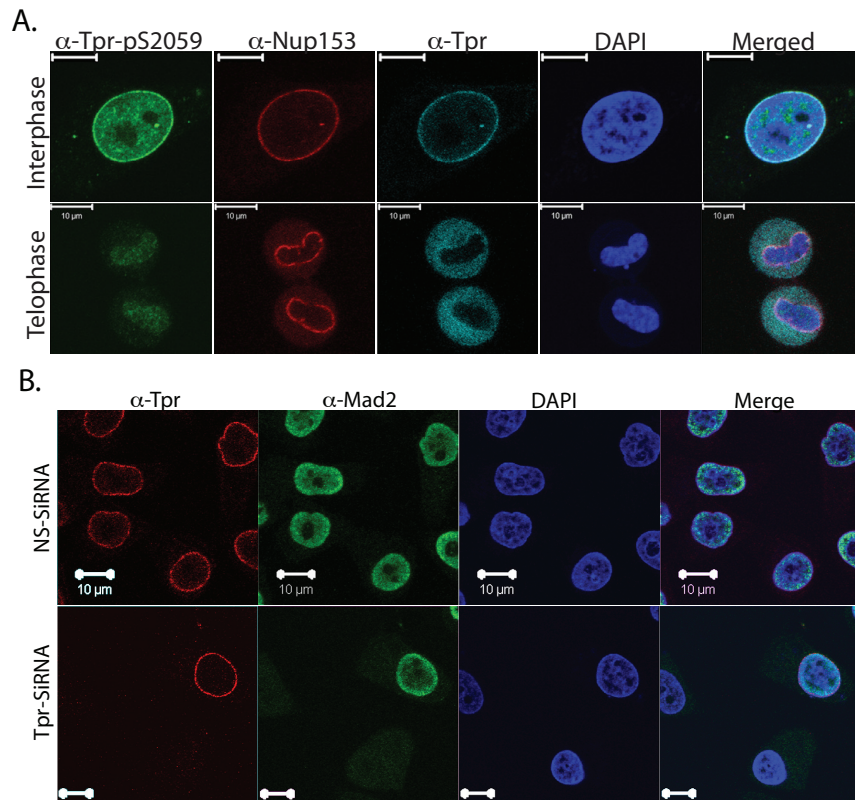

Supplement: supp_127.16.3505_JCS149112.pdf [file supp_127.16.3505_JCS149112.pdf]
